# Supplementary material
Source: Copernicus journal article supplement (doi:10.5194/tc-20-2681-2026)
Supplement: Supplementary file [file tc-20-2681-2026-supplement-title-page.pdf › tc-20-2681-2026-supplement-title-page.pdf]

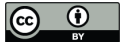

*Supplement of*

**Ensemble numerical simulation of permafrost thermal regimes over the Tibetan Plateau using the Flexible Permafrost Model: 1950–2023**

**Wen Sun and Bin Cao**

*Correspondence to:* Bin Cao ([bin.cao@itpcas.ac.cn](mailto:bin.cao@itpcas.ac.cn))

- [tc-20-2681-2026-supplement-title-page.pdf](#)
- [ALT\\_Obs.csv](#)
- [InventoryReference.csv](#)
- [MAGT\\_Obs.csv](#)

The copyright of individual parts of the supplement might differ from the article licence.
